# Supplementary material for: Rh(ii) catalysed intramolecular C–H insertion of diazo substrates in water: a simple and efficient approach to catalyst reuse
Source: Royal Society of Chemistry journal article supplement (doi:10.1039/b414233k), 2005-01-01

# Electronic Supplementary Information

## Rh(II) Catalysed Intramolecular C-H Insertion of Diazo Substrates in Water: A Simple and Efficient Approach for Catalyst Reuse

Nuno Candeias,<sup>a</sup> Pedro M. P. Gois<sup>a</sup> and Carlos A. M. Afonso<sup>\*b</sup>

<sup>a</sup> REQUIMTE/CQFB, Departamento de Química, Faculdade de Ciências e Tecnologia, Universidade Nova de Lisboa, 2829-516 Caparica, Portugal

<sup>b</sup> CQFM, Departamento de Engenharia Química, Instituto Superior Técnico, 1049-001 Lisboa, Portugal. Fax: + 351 21 8417122; Tel: + 351 21 8417627; E-mail: carlosafonso@ist.utl.pt c

### General Procedure for the Rhodium(II)-Catalysed Cyclization of $\alpha$ -diazo- $\alpha$ -phosphono substrates in water.

To a solution of dirhodium(II) tetraacetate (1.0 mol %) in water (1.5 mL) was added the appropriate diazo compound (0.154 mmol). The reaction mixture was heated at 80 °C until disappearance of the substrate (determined by TLC). The mixture was concentrated under reduced pressure and the residue was purified by flash chromatography (basic alumina with AcOEt/Hexane), yielding the desired compounds.

### Procedure for Rhodium(II) Recycling

To a solution of dirhodium(II) tetraacetate (1.0 mol %) in water (1.5 mL) was added  $\alpha$ -diazo- $\alpha$ -(diethoxyphosphoryl)-*N,N*-(diisopropyl)acetamide **1a** (0.154 mmol). The reaction mixture was heated at 80 °C for 24h, the product was extracted from the reaction medium with Et<sub>2</sub>O (10×1.5mL) and more substrate was added (0.154 mmol) to the system.

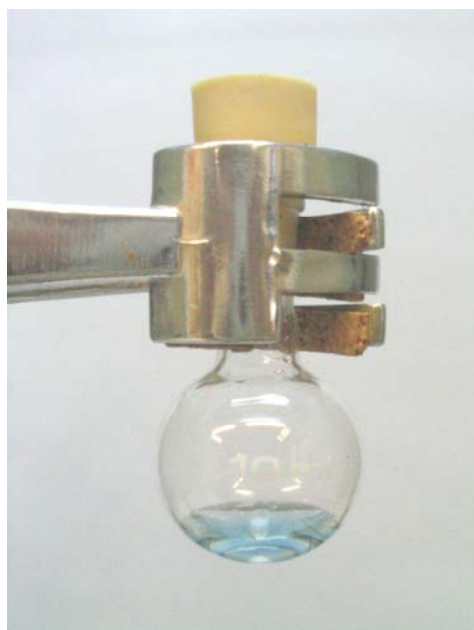

Figure 1: Dirhodium(II) tetraacetate aqueous solution

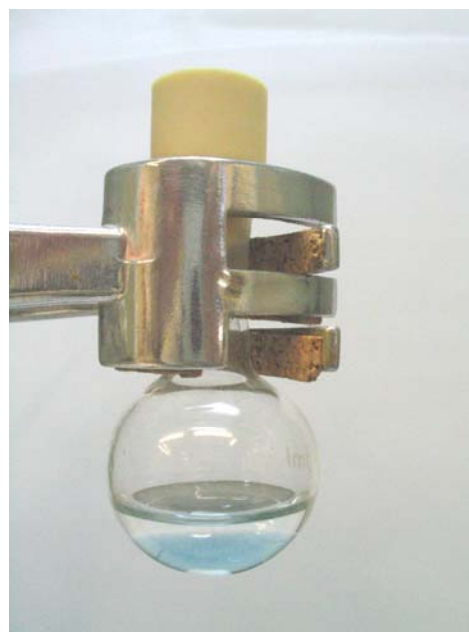

Figure 2: Dirhodium(II) tetraacetate aqueous solution upon 1.5 ml ether extraction

**Figure 3:**  $^1\text{H}$  NMR crude spectra of cyclization reaction on substrate **1a**.

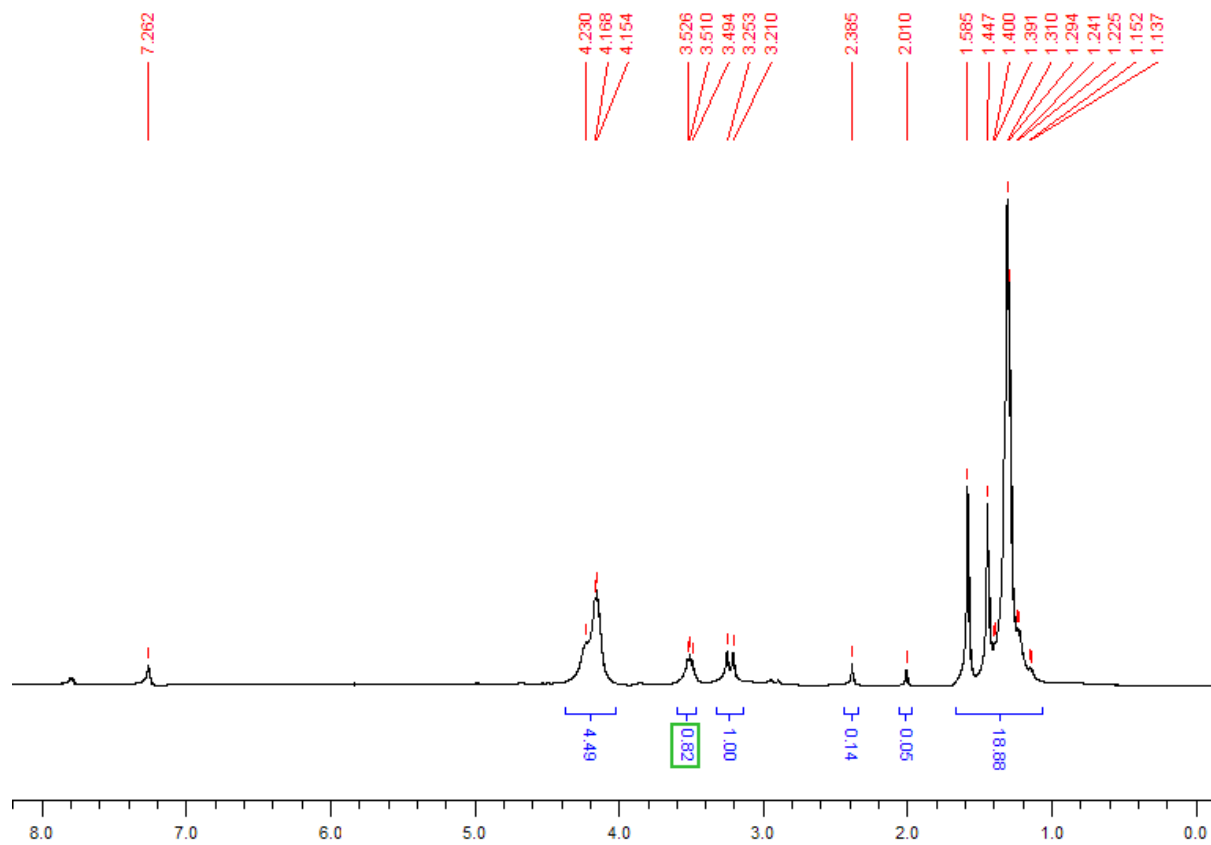

**Figure 4:**  $^{31}\text{P}$  NMR spectra of **1a**.

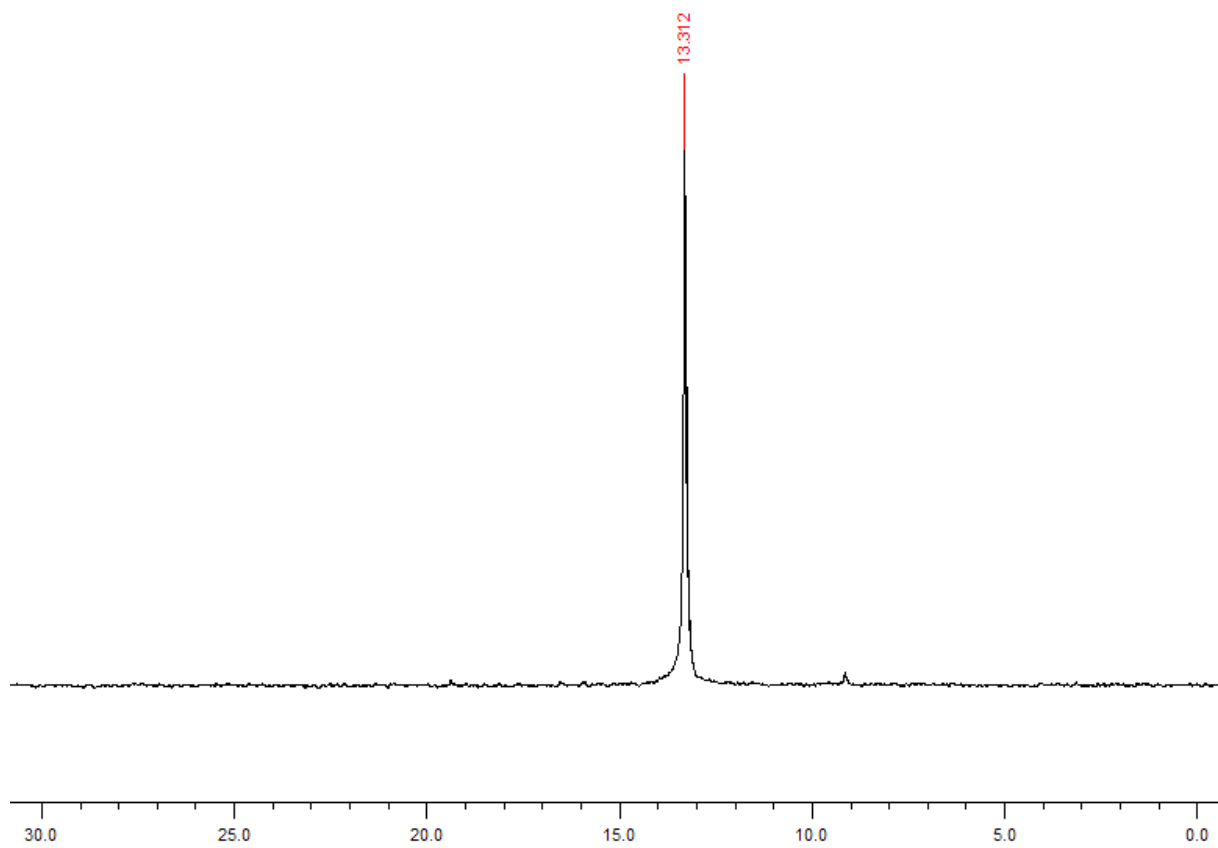

**Figure 5:**  $^{31}\text{P}$  NMR crude spectra of cyclization reaction on substrate **1a**.

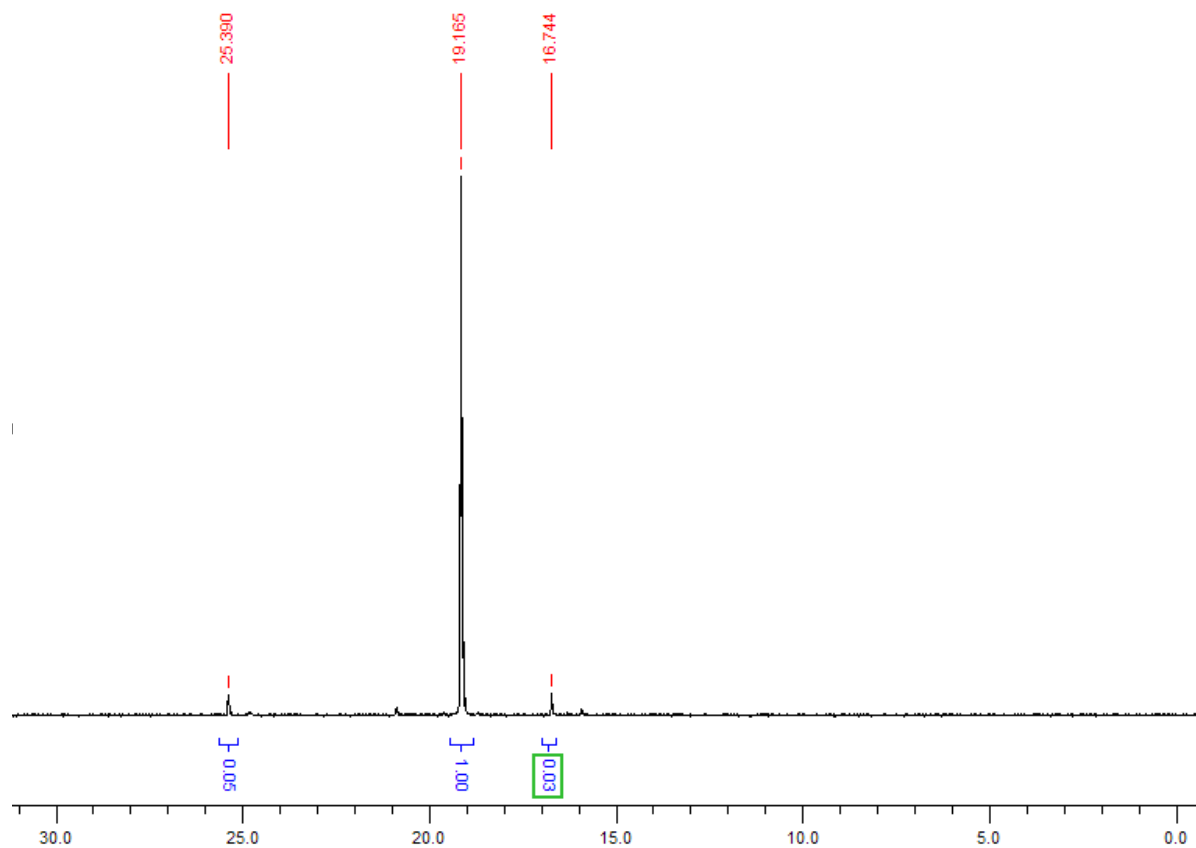

**Figure 6:**  $^1\text{H}$  NMR crude spectra of cyclization reaction on substrate **1c**.

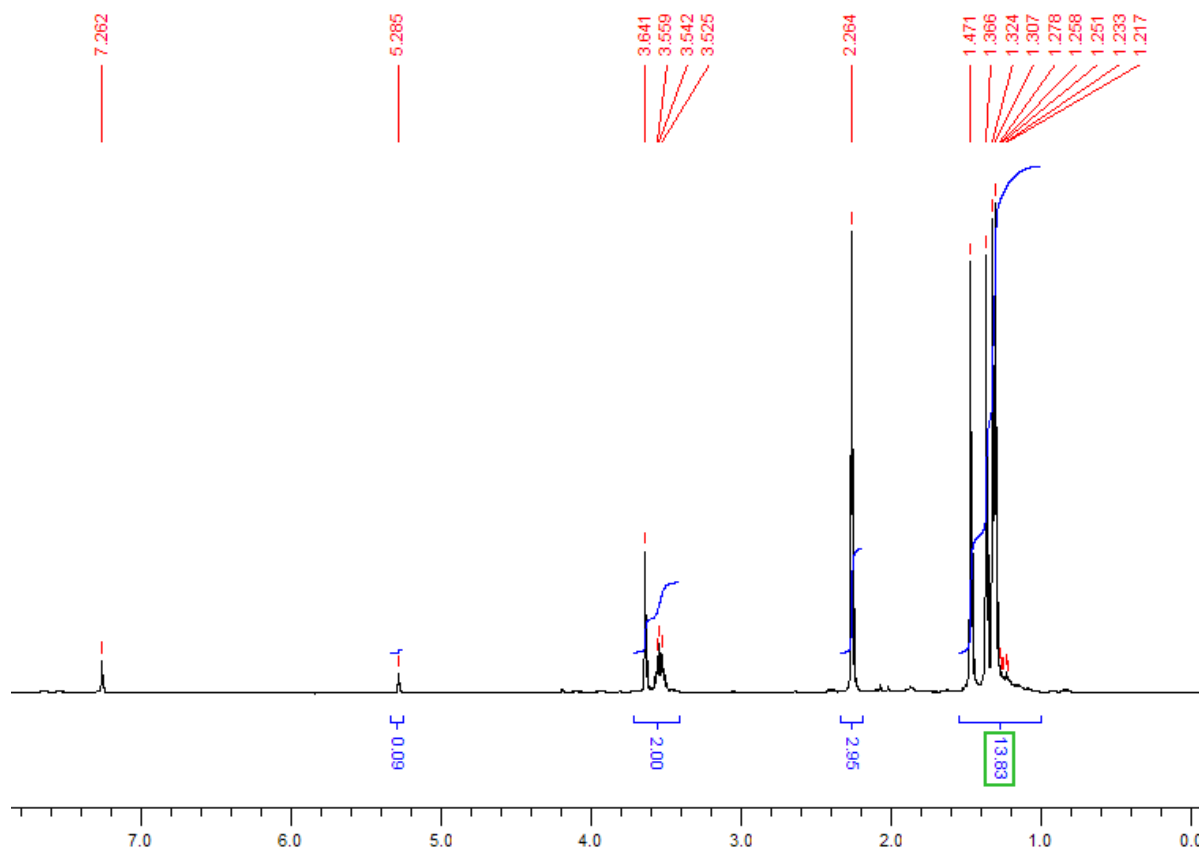

**Figure 7:**  $^1\text{H}$  NMR spectra of isolated  $\beta$ -lactam **2c**.

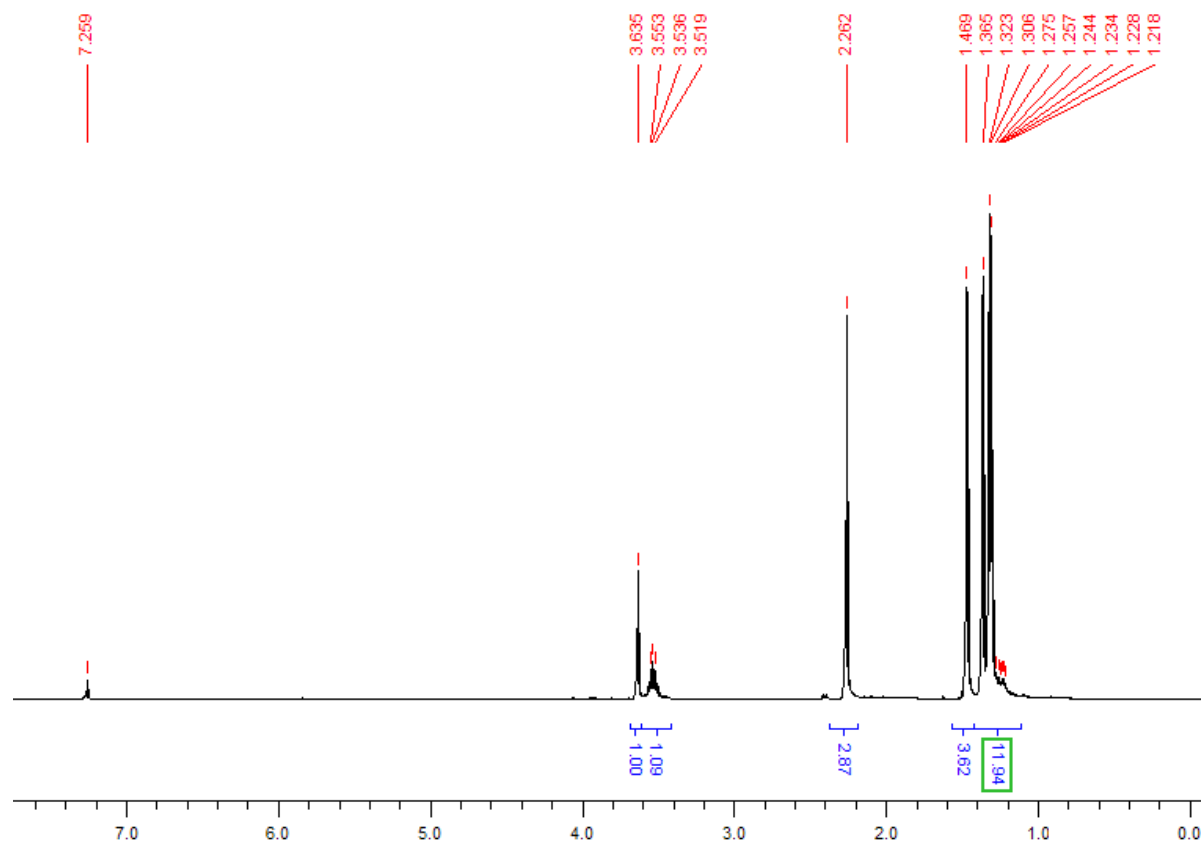

Supplement: b414233k.pdf [file b414233k.pdf]
